# Supplementary material for: An Analysis of Peer-Reviewed Scores and Impact Factors with Different Citation Time Windows: A Case Study of 28 Ophthalmologic Journals
Source: PLoS One. 2015 Aug 21;10(8):e0135583. doi: 10.1371/journal.pone.0135583 (PMC4546661; doi:10.1371/journal.pone.0135583)
Supplement: S1 Dataset — (XLS) [file pone.0135583.s001.xls]

## Sheet: summary
Arch Ophthalmol	411.8
Invest Ophth Vis Sci	401.4
Am J Ophthalmol	338.5
Ophthalmology	334.4
Surv Ophthalmol	237
Exp Eye Res	212
Graef Arch Clin Exp	192.5
Retina-J Ret Vit Dis	192
Mol Vis	164
Curr Opin Ophthalmol	162
Cornea	159.5
J Cataract Refr Surg	155.5
J AAPOS	140.5
J Glaucoma	134.5
J Neuro-Ophthalmol	121.5
J Vision	117
Visual Neurosci	107.5
J Pediat Ophth Strab	101.5
J Ocul Pharmacol Th	100.5
Ophthal Plast Recons	100
Neuro-Ophthalmology	97.5
Ophthal Surg Las Im	96.5
J Refract Surg	91.8
Optometry Vision Sci	79
Ophthalmic Genet	64.5
Ocul Surf	63
Eye Contact Lens	60
Cutan Ocul Toxicol	54.5

## Sheet: original data
Number	AM J OPHTHALMOL American Journal of Ophthalmology	ARCH OPHTHALMOL-CHIC Archives of Ophthalmology	CORNEA	CURR OPIN OPHTHALMOL Current Opinion in Ophthalmology	CUTAN OCUL TOXICOL Cutaneous and Ocular Toxicology	EXP EYE RES Experimental Eye Research	EYE CONTACT LENS Eye and Contact Lens: Science and Clinical Practice	GRAEF ARCH CLIN EXP Graefes Archive for Clinical and Experimental Ophthalmology	INVEST OPHTH VIS SCI Investigative Ophthalmology & Visual Science	J AAPOS Journal of American Association for Pediatric Ophthalmology and Strabismus	J CATARACT REFR SURG Journal of Cataract & Refractive Surgery	J GLAUCOMA Journal of Glaucoma	J NEURO-OPHTHALMOL Journal of Neuro-Ophthalmolog	J OCUL PHARMACOL TH Journal of Ocular Pharmacology and Therapeutics	J PEDIAT OPHTH STRAB Journal of Pediatric Ophthalmology & Strabismus	J REFRACT SURG Journal of Refractive Surgery	J VISION Journal of Vision	MOL VIS Molecular Vision	NEURO-OPHTHALMOLOGY Neuro-Ophthalmology	OCUL SURF Ocular Surface	OPHTHAL PLAST RECONS Ophthalmic Plastic and Reconstructive Surgery	OPHTHAL SURG LAS IM Ophthalmic Surgery, Lasers and Imaging	OPHTHALMIC GENET Ophthalmic Genetics	OPHTHALMOLOGY	OPTOMETRY VISION SCI Optometry and Vision Science	RETINA-J RET VIT DIS Retina-The Journal of Retinal and Vitreous Diseases	SURV OPHTHALMOL Survey of Ophthalmology	VISUAL NEUROSCI Visual Neuroscience
3	8	9						3			4													10		3	1
4	9	7							9												6			9			5
10	3	2	2	7	7	5	8	5	2	10	6	6	7	4	5	6	3	4	4	5	6	7	6	1	5	3	2	6
16	8	9						6	9		10			9		8				8			7
17	8	8	5		2	5	1	5	9	5	5	5	3	3	5	3	5		3		2	2		8	1	8	8	1
18	4	6							7															7		3	4
19	9.8	9.8	7	3			5		8	7	7	7	5		5	6					7	4		10	1	7	5
20	10	6	8	5				8	10	8					8				8		9	8		10		10	8
21	10	10	8	5		8		9	10												10	10		9	2	9	7	3
28						4			6									5										4
29		7	4	4.5			4.5		7.5			4						5	4
31	9	7.5	7.5	5.5			4		9.5		5.5									9				8.5			4.5
33	5	6							6				3						2				3	5		3	3
35	10	10	6	6	1			6	9	4	6	6		1	2	3			5	4	5	5		10		7	6
36	10	10							10	10					1									10			7
37	8	8	5	3	6	4	2	8	9	5	2	7	8	8	5	3		8	5	2	4	3	9	8	8	4	8	9
38	8	9	5				3		4		4					2						3		4		6
39	8.5	9		9		6		6.5	9.5	6.5	8.5							6					6	10		7.5		4.5
44	2			3.5		2						5			1					2				6				2
45	7	10	5						10	5			4											10		7
46	5	8				9		7	10			6	6				7	9	6									8
48	5	5	3			3					3	2	2				4	3				2		5		4	5	2
49	10	10																				8		10		10	9
50	9	10	8	7	5	9		8	10		9	3				8	5	7						8	7		9
51	8	8								8	7				5	7								8			7
52	5	2	2	3		10		3	10			3		1			3	8						1				6
55	9	8	5	2		4		6	8		6							2		2		1		10			3
58		8						8	8				6	5			5	5	5					8		8
60		7		7		9		7	10			8
65		8				8			10								5	8
67	3	9	3	7	3	8	2	4	10	2	2	2	4	6	3	2	7	8	4	2	4	3	3	5	3	3	8	4
68	2	2	1	1	1	3	1	1	7	1	1	1	1	1	1	1	1	6	1	1	1	1	2	2		2		2
69		7				6			8									7
73	2	3	1	2	1	2	1	1	9	1	2	1	1	1	2	2	7	1	1	1	1	1	1	1	4	1	2	3
76	3					2.5				2					1		2								2		1	2
78	7	5	3	7	1	5	1	1	7	3	3	3	1	1	1	1	1	6	1	1	1	2	1	7	1	4	6	2
82	5	5.5	3	3.5	3.5	6	2.5	8	9.5	2	4.5	8.5	6.5	7.5	3	3.5	4.5	8.5	6	3.5	3.5	3	4	8	5.5	4.5	8	4.5
85			7					3	9															8
90	7	8				6		4	9					5				7								4	5
114	5	9	1	3		1		2	5	3	2	1	1	1	1	2		3				1	2	9	1		7
124	8	7	7			7			8	5	8	6	7		6	6			6		6			9	4		8
127	9	9	6	5		7	5	4	8			7		5			4	5		2			5	8	5	7	8
135	6	5	3		2	9		3	8					3		2	2	4						6		2	3
138	5	5		10						4												2		9		5	7
142	4	4						5				2				3						1				3		1
146	3	4	4	3	3	4	3	3	5	2	2	3	2	3	2	3	3	4	2	3	2	2	2	2	3	2	3	1
147						7		4	10								6	6										9
151	5.5	5	6	4.5	2.5	6	3	2	4	3.5	3.5	3	3.5	3	3	2.5	4.5	4.5	2.5	2	3.5	2.5	1.5	2.5	3	3.5	2	3.5
152	6	8	7			7		7	8			5		7								3				6	7
153	9	9	7	6	6	7	6	6	9	7	7	6	7	6	7	4	5		6		6	5		9		7	3
177	9	10						2	5	6		8										5		10			8
179	4	5	5	8	2	5	2	2	7	3	3	3	5	4	4	4	8	7	6	2	2			8	4	5		6
189	2	6	1	3	1	5	1	5	10	5	1	1	2	1	5	1	3	3	2	1	1	1	3	3	9	3	3	8
200	8	9		10			1	7					10		9						10	6		10		10	10
201	9.5	9.8	5	3	1.5	3	1	7.5	8.5	3.5	8.5	3.5	3	6		4.5	2	2.5	3	2.5	6	2	3	9.9	2	7	9	3.5
210		5			2		1	4							3.5					5				3			6
217	9	10									6													7			10
221	5	10	5	2		5			9	6	5		5	4										5		8	4
223	8.2	9.2	4	6.5	4	7.5	2	6.5	9.9	3	4	8.5	8.5	5	5	4.3	8	4.5	5	5	4	3	6	7.5	8.5	5.5	7.5	8.5
227	6	6				7		5	8								4	7										4
233		10		7						10	10		10		8		8		10
Total	338.5	411.8	159.5	162	54.5	212	60	192.5	401.4	140.5	155.5	134.5	121.5	100.5	101.5	91.8	117	164	97.5	63	100	96.5	64.5	334.4	79	192	237	107.5
